# Supplementary material for: Variable architectures of Zinc coordination polymers modeled by tetra-pyridine ligands with different anions
Source: Royal Society of Chemistry journal article supplement (doi:10.1039/c2ce25906k), 2012-01-01
Supplement: c2ce25906k.pdf [file c2ce25906k.pdf]

# Variable Architecture of Zinc Coordination Polymers

## Modeled By Tetra-pyridinate Ligand With Different Anions

Fan Yu,<sup>a</sup> Wen-Jing Yu,<sup>b</sup> Bao Li,<sup>b,\*</sup> Tian-le Zhang<sup>b</sup>

<sup>a</sup>School of chemistry and environmental engineering, Jiangnan University, Wuhan, Hubei 430056, P.R. China, <sup>b</sup> Department of Chemistry and Chemical Engineering, Huazhong University of Science and Technology, Wuhan, Hubei 430074, P.R. China

### Experimental sections

**Materials and General Methods.** All starting materials were obtained commercially and were used without further purification. Elemental analyses for C, H, N were performed on a Perkin-Elmer 240Q elemental analyzer. The IR spectra were recorded in range of 400-4000 cm<sup>-1</sup> on a Nicolet 5DX spectrometer (KBr pellets). The ligand TPOM was synthesized by a literature method.<sup>1</sup> Low-pressure N<sub>2</sub> adsorption measurements (up to 1 bar) were performed on Micromeritics ASAP 2020 M+C surface area and pore size analyzer.

**Synthesis of {[Zn<sub>2</sub>(TPOM<sub>2</sub>)<sub>2</sub>(Cl)<sub>4</sub>]}<sub>n</sub> (1).** A mixture of ZnCl<sub>2</sub> ( 13mg, 0.1 mmol) and TPOM<sub>2</sub> ( 5.5mg, 0.025 mmol) was dissolved in 15 mL of CH<sub>3</sub>CN. The final mixture was refluxed for 1 hours. Large bulk crystals were obtained from the filtrate. Yield of the reaction was ca. 15% based on TPOM<sub>2</sub>. Anal. Calcd for C<sub>50</sub>H<sub>50</sub>Cl<sub>8</sub>N<sub>8</sub>O<sub>9</sub>Zn<sub>4</sub>: H 3.47%, C 41.36%, N 7.72%; found H 3.12%, C 40.96%, N 7.22%.

**Synthesis of {[Zn<sub>2</sub>(TPOM<sub>2</sub>)(L1)<sub>4</sub>]·4H<sub>2</sub>O}<sub>n</sub> (2).** A mixture of Zn(OAc)<sub>2</sub> ( 18mg, 0.1 mmol), benzoic acid ( 8 mg, 0.05 mmol) and TPOM<sub>2</sub> ( 5.5mg, 0.025 mmol) was dissolved in 12 mL of CH<sub>3</sub>OH/H<sub>2</sub>O ( 1:5, v/v ). The final mixture was placed in a Parr Teflon-lined stainless steel vessel (25mL) under autogenous pressure and heated at 130°C for 3 days. Needle-like crystals were obtained, and crystals were filtered off, washed with mother liquid, and dried under ambient conditions. Yield of the reaction was ca. 41% based on TPOM<sub>2</sub>. Anal. Calcd for C<sub>53</sub>H<sub>52</sub>N<sub>4</sub>O<sub>16</sub>Zn<sub>2</sub>: H 4.63 %, C 56.25%, N 4.95% ; found H 4.11 %, C 56.76%, N 4.23%.

**Synthesis of {[Zn<sub>4</sub>(TPOM<sub>2</sub>)(L2)<sub>4</sub>]·guest}<sub>n</sub> (3).** A mixture of Zn(OAc)<sub>2</sub> ( 18mg, 0.1 mmol), H<sub>2</sub>BDC ( 10 mg, 0.05 mmol) and TPOM<sub>2</sub> ( 5.5mg, 0.025 mmol) was dissolved in 12 mL of DMF/CH<sub>3</sub>OH/H<sub>2</sub>O ( 1:1:4, v/v/v ). The final mixture was placed in a Parr Teflon-lined stainless

\* Correspondence e-mail: libao@mail.hust.edu.cn Fax: 86-027-87543532

steel vessel (25mL) under autogenous pressure and heated at 140°C for 3 days. Block-like crystals were obtained, and crystals were filtered off, washed with mother liquid, and dried under ambient conditions. Yield of the reaction was ca. 60% based on TPOM2. Anal. Calcd for dyhydrated  $C_{57}H_{40}N_4O_{20}Zn_4$ : H 2.96%, C 50.25%, N 4.11%; found H 3.45%, C 51.15%, N 4.99%.

**Synthesis of  $\{[Zn(TPOM)(Cl)_2]\}_n$  (4).** The synthesis process is very similar to **1** except for TPOM. The final mixture was refluxed for 1 hours. Large bulk colorless-block crystals were obtained from the filtrate. Yield of the reaction was ca. 15% based on TPOM. Anal. Calcd for  $C_{25}H_{24}Cl_2N_4O_4Zn$ : H 4.17%, C 51.70%, N 9.65%; found H 3.92%, C 51.20%, N 9.22%.

**Synthesis of  $\{[Zn_2(TPOM)(L1)_4] \cdot 2H_2O\}_n$  (5).** A mixture of  $Zn(OAc)_2$  ( 18mg, 0.1 mmol), benzoic acid ( 8 mg, 0.05 mmol) and TPOM ( 5.5mg, 0.025 mmol) was dissolved in 12 mL of  $CH_3OH/H_2O$  ( 1:5, v/v ). The final mixture was placed in a Parr Teflon-lined stainless steel vessel (25mL) under autogenous pressure and heated at 120°C for 3 days. Needle-like crystals were obtained, and crystals were filtered off, washed with mother liquid, and dried under ambient conditions. Yield of the reaction was ca. 41% based on TPOM. Anal. Calcd for  $C_{53}H_{48}N_4O_{14}Zn_2$ : H 4.42 %, C 58.10%, N 5.11% ; found H 4.22 %, C 58.76%, N 5.35%.

**Synthesis of  $\{[Zn_2(TPOM)(L2)_2] \cdot 4H_2O\}_n$  (6).** A mixture of  $Zn(OAc)_2$  ( 18mg, 0.1 mmol),  $H_2BDC$  ( 10 mg, 0.05 mmol) and TPOM ( 5.5mg, 0.025 mmol) was dissolved in 8 mL of  $CH_3OH/H_2O$  ( 4:4, v/v ). The final mixture was placed in a Parr Teflon-lined stainless steel vessel (25mL) under autogenous pressure and heated at 140°C for 3 days. Block-like crystals were obtained, and crystals were filtered off, washed with mother liquid, and dried under ambient conditions. Yield of the reaction was ca. 60% based on TPOM. Anal. Calcd for dyhydrated  $C_{57}H_{40}N_4O_{20}Zn_4$ : H 4.13%, C 50.48%, N 5.74%; found H 4.42%, C 51.05%, N 5.89%.

**X-Ray Structural Determination.** X-ray diffraction data of **1** ( 0.25 × 0.2 × 0.15 mm ), **2** ( 0.3 × 0.2 × 0.2 mm ), **4** ( 0.25 × 0.15 × 0.1 mm ), **5** ( 0.25 × 0.15 × 0.10 mm ) and **6** ( 0.25 × 0.15 × 0.10 mm ) were collected on Oxford Gemini S Ultra diffractometer using  $Mo-K\alpha$  ( $\lambda = 0.71073 \text{ \AA}$ ) radiation at room temperature , except for **3** ( 0.2 × 0.2 × 0.1 mm ) using  $Cu-K\alpha$  ( $\lambda = 1.54178 \text{ \AA}$ ) radiation at 170 K . The structures of complexes were solved by direct methods, and the non-hydrogen atoms were located from the trial structure and then refined anisotropically with SHELXTL using a full-matrix leastsquares procedure based on  $F^2$  values.<sup>2</sup> The hydrogen atom positions were fixed geometrically at calculated distances and allowed to ride on the parent atoms.

The method of *SQUEEZE* in *PLATON* was carried out in the final crystal resolutions for **3** and **6**<sup>21</sup>.  
CCDC-871661 (1), CCDC-871662 (2), CCDC-871663 (3), CCDC-871663 (4), CCDC-877830  
(4), CCDC-877831 (5) and CCDC-877832 (6) contain the supplementary crystallographic data  
for this paper. These data can be obtained free of charge from The Cambridge Crystallographic  
Data Centre via <http://www.ccdc.cam.ac.uk/datarequest/cif>.

**Reference:**

- (1) Ryan, P. E.; Lescop, C.; Laliberté, D.; Hamilton, T.; Maris, T.; Wuest, J. D. *Inorg. Chem.* **2009**, *48*, 2793.
- (2) (a) Altomare, A.; Burla, M. C.; Camalli, M.; Casciarano, G. L.; Giacovazzo, C.; Guagliardi, A.; Moliterni, A. G. G.; Polidori, G.; Spagna, R. *J. Appl. Crystallogr.* **1999**, *32*, b115-119; b) G. M. Sheldrick, *SHELXL-97; Program for refinement of crystal structures*. University of Göttingen, Göttingen, Germany, **1997**.

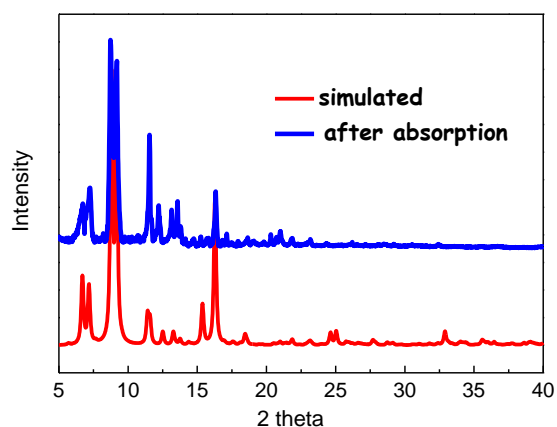

**Figure S1.** XRD spectrum of **3**

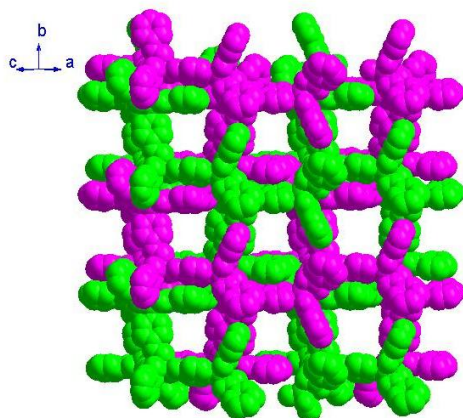

**Figure S2.** the packing mode of the 2-fold interpenetrating structure of **5**, showing the pores which were filled with isolated aqua molecules.
